# Supplementary material for: Risk of Poisoning from Garden Plants: Misidentification between Laurel and Cherry Laurel
Source: MDPI journal article supplement (doi:10.3390/toxins14110726), 2022-10-24
Supplement: s1 [file s1]

# Supplementary Materials: Risk of Poisoning from Garden Plants: Misidentification between Laurel and Cherry Laurel

Paola Malaspina, Federica Betuzzi, Mariarosaria Ingegneri, Antonella Smeriglio, Laura Cornara and Domenico Trombetta

**Table S1.** Optimization of the extraction process carried out on fresh (FL) and dry (DL) leaves of *P. laurocerasus*. The numbers in bold represent the extraction conditions in which the highest prunasin content was obtained, as determined by HPLC-DAD analysis. The results represent the mean  $\pm$  the standard deviation of three experiments in triplicate ( $n = 3$ ).

| Temperature (°C) | Solvent (EtOH/H <sub>2</sub> O, <i>v/v</i> ) | Time (min) | Prunasin (g/100 g FLE*)           | Prunasin (g/100 g DLEs)           |
|------------------|----------------------------------------------|------------|-----------------------------------|-----------------------------------|
| 25               | 90:10                                        | 15         | 2.56 $\pm$ 0.05                   | 2.59 $\pm$ 0.03                   |
| 25               | 90:10                                        | 30         | 2.84 $\pm$ 0.03                   | 2.83 $\pm$ 0.02                   |
| 25               | 90:10                                        | 60         | 2.98 $\pm$ 0.07                   | 3.01 $\pm$ 0.03                   |
| 25               | 80:20                                        | 15         | 3.12 $\pm$ 0.12                   | 3.15 $\pm$ 0.05                   |
| 25               | 80:20                                        | 30         | 3.21 $\pm$ 0.08                   | 3.18 $\pm$ 0.10                   |
| 25               | 80:20                                        | 60         | 3.43 $\pm$ 0.02                   | 3.41 $\pm$ 0.04                   |
| 25               | 70:30                                        | 15         | 3.65 $\pm$ 0.03                   | 3.62 $\pm$ 0.05                   |
| <b>25</b>        | <b>70:30</b>                                 | <b>30</b>  | <b>3.88 <math>\pm</math> 0.04</b> | <b>3.85 <math>\pm</math> 0.05</b> |
| 25               | 70:30                                        | 60         | 3.54 $\pm$ 0.05                   | 3.58 $\pm$ 0.01                   |
| 25               | 60:40                                        | 15         | 3.33 $\pm$ 0.07                   | 3.35 $\pm$ 0.05                   |
| 25               | 60:40                                        | 30         | 3.28 $\pm$ 0.11                   | 3.20 $\pm$ 0.06                   |
| 25               | 60:40                                        | 60         | 3.10 $\pm$ 0.02                   | 3.15 $\pm$ 0.08                   |
| 25               | 50:50                                        | 15         | 2.76 $\pm$ 0.01                   | 2.75 $\pm$ 0.04                   |
| 25               | 50:50                                        | 30         | 2.82 $\pm$ 0.03                   | 2.85 $\pm$ 0.06                   |
| 25               | 50:50                                        | 60         | 2.88 $\pm$ 0.04                   | 2.91 $\pm$ 0.05                   |
| 30               | 90:10                                        | 15         | 2.82 $\pm$ 0.05                   | 2.78 $\pm$ 0.06                   |
| 30               | 90:10                                        | 30         | 2.94 $\pm$ 0.02                   | 2.98 $\pm$ 0.04                   |
| 30               | 90:10                                        | 60         | 3.04 $\pm$ 0.03                   | 3.08 $\pm$ 0.04                   |
| 30               | 80:20                                        | 15         | 3.21 $\pm$ 0.04                   | 3.17 $\pm$ 0.05                   |
| 30               | 80:20                                        | 30         | 3.28 $\pm$ 0.07                   | 3.22 $\pm$ 0.08                   |
| 30               | 80:20                                        | 60         | 3.32 $\pm$ 0.08                   | 3.35 $\pm$ 0.05                   |
| 30               | 70:30                                        | 15         | 3.55 $\pm$ 0.05                   | 3.51 $\pm$ 0.06                   |
| 30               | 70:30                                        | 30         | 3.62 $\pm$ 0.07                   | 3.57 $\pm$ 0.05                   |
| 30               | 70:30                                        | 60         | 3.60 $\pm$ 0.02                   | 3.55 $\pm$ 0.08                   |
| 30               | 60:40                                        | 15         | 2.45 $\pm$ 0.07                   | 2.47 $\pm$ 0.04                   |
| 30               | 60:40                                        | 30         | 2.54 $\pm$ 0.05                   | 2.58 $\pm$ 0.06                   |
| 30               | 60:40                                        | 60         | 2.51 $\pm$ 0.07                   | 2.53 $\pm$ 0.09                   |
| 30               | 50:50                                        | 15         | 2.21 $\pm$ 0.01                   | 2.25 $\pm$ 0.06                   |
| 30               | 50:50                                        | 30         | 2.30 $\pm$ 0.02                   | 2.27 $\pm$ 0.04                   |
| 30               | 50:50                                        | 60         | 2.35 $\pm$ 0.03                   | 2.37 $\pm$ 0.02                   |
| 60               | 90:10                                        | 15         | 2.65 $\pm$ 0.03                   | 2.68 $\pm$ 0.05                   |
| 60               | 90:10                                        | 30         | 2.71 $\pm$ 0.05                   | 2.70 $\pm$ 0.06                   |
| 60               | 90:10                                        | 60         | 2.80 $\pm$ 0.07                   | 2.82 $\pm$ 0.04                   |

|    |       |    |                 |                 |
|----|-------|----|-----------------|-----------------|
| 60 | 80:20 | 15 | $2.83 \pm 0.09$ | $2.86 \pm 0.05$ |
| 60 | 80:20 | 30 | $2.95 \pm 0.10$ | $2.91 \pm 0.04$ |
| 60 | 80:20 | 60 | $3.04 \pm 0.12$ | $3.07 \pm 0.07$ |
| 60 | 70:30 | 15 | $3.21 \pm 0.03$ | $3.22 \pm 0.02$ |
| 60 | 70:30 | 30 | $3.34 \pm 0.02$ | $3.32 \pm 0.03$ |
| 60 | 70:30 | 60 | $3.15 \pm 0.05$ | $3.11 \pm 0.06$ |
| 60 | 60:40 | 15 | $2.54 \pm 0.07$ | $2.55 \pm 0.04$ |
| 60 | 60:40 | 30 | $2.65 \pm 0.05$ | $2.63 \pm 0.06$ |
| 60 | 60:40 | 60 | $2.72 \pm 0.02$ | $2.71 \pm 0.01$ |
| 60 | 50:50 | 15 | $2.23 \pm 0.03$ | $2.24 \pm 0.02$ |
| 60 | 50:50 | 30 | $2.30 \pm 0.02$ | $2.29 \pm 0.02$ |
| 60 | 50:50 | 60 | $2.38 \pm 0.02$ | $2.39 \pm 0.01$ |

---

\*FLE, Fresh leaf extract; §DLE, dry leaf extract.
